# Supplementary material for: Ionic fullerene complex (DMI+)3·(C60˙−)·(I−)2 with 2H-hexagonal fullerene packing and 3-D DMI+-I− network
Source: Royal Society of Chemistry journal article supplement (doi:10.1039/b812803k), 2009-01-01
Supplement: b812803k.pdf [file b812803k.pdf]

**Table S1.** IR-spectra of starting compounds and complex **1**.

| Components       | C <sub>60</sub> | DMI-I | (DMI <sup>+</sup> ) <sub>3</sub> ·(C <sub>60</sub> <sup>•-</sup> )·(I <sup>-</sup> ) <sub>2</sub> |
|------------------|-----------------|-------|---------------------------------------------------------------------------------------------------|
| DMI <sup>+</sup> |                 | 521w  | 514w                                                                                              |
|                  |                 | 620s  | 621s                                                                                              |
|                  |                 | 715w  | 716w                                                                                              |
|                  |                 | 754m  | 764sh. 769m                                                                                       |
|                  |                 | 834w  | 874w                                                                                              |
|                  |                 | 1021w | -                                                                                                 |
|                  |                 | 1084w | -                                                                                                 |
|                  |                 | 1175s | 1184s*                                                                                            |
|                  |                 | 1286w | 1291w                                                                                             |
|                  |                 | 1342w | -                                                                                                 |
|                  |                 | 1418w | -                                                                                                 |
|                  |                 | 1452w | -                                                                                                 |
|                  |                 | 1487w | -                                                                                                 |
|                  |                 | 1577s | 1572m 1576m                                                                                       |
|                  |                 | 1620m | -                                                                                                 |
|                  |                 | 2853w | 2851w                                                                                             |
|                  |                 | 2949w | 2971w 2995w                                                                                       |
|                  |                 | 3090s | 3091s                                                                                             |
|                  |                 | 3156w | 3146w                                                                                             |
| C <sub>60</sub>  | 526s            |       | 526w                                                                                              |
|                  | 576m            |       | 575s                                                                                              |
|                  | 1182m           |       | 1184s*                                                                                            |
|                  | 1429s           |       | 1387s 1392s 1397s                                                                                 |

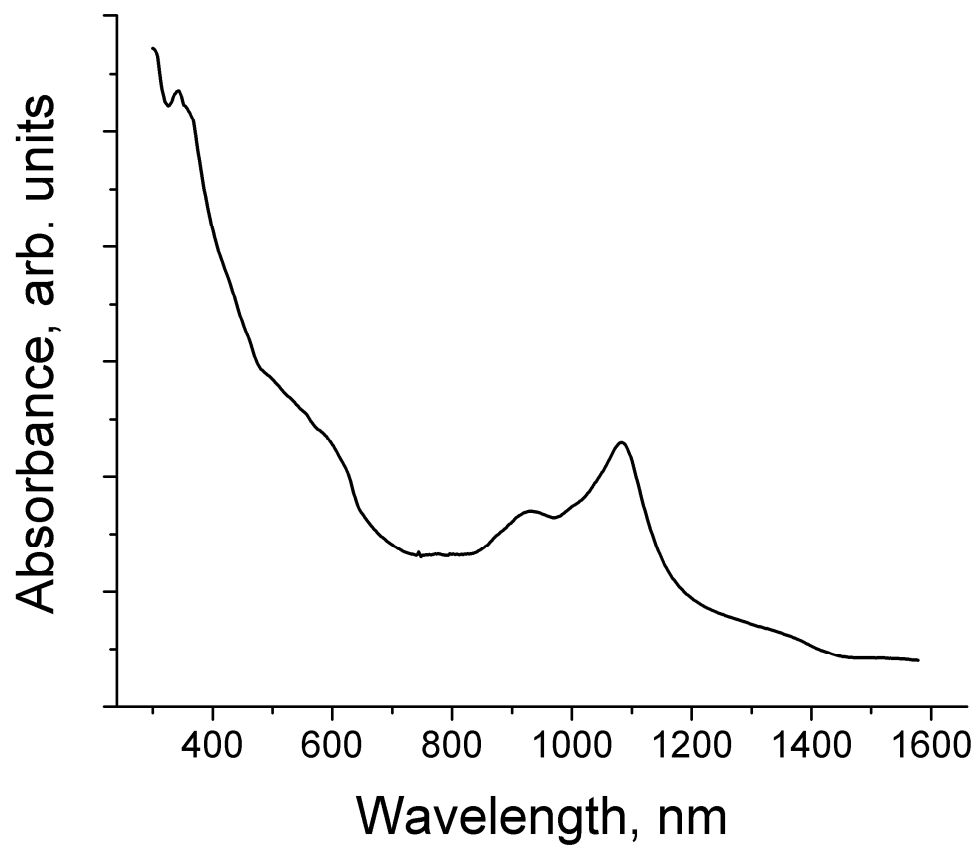

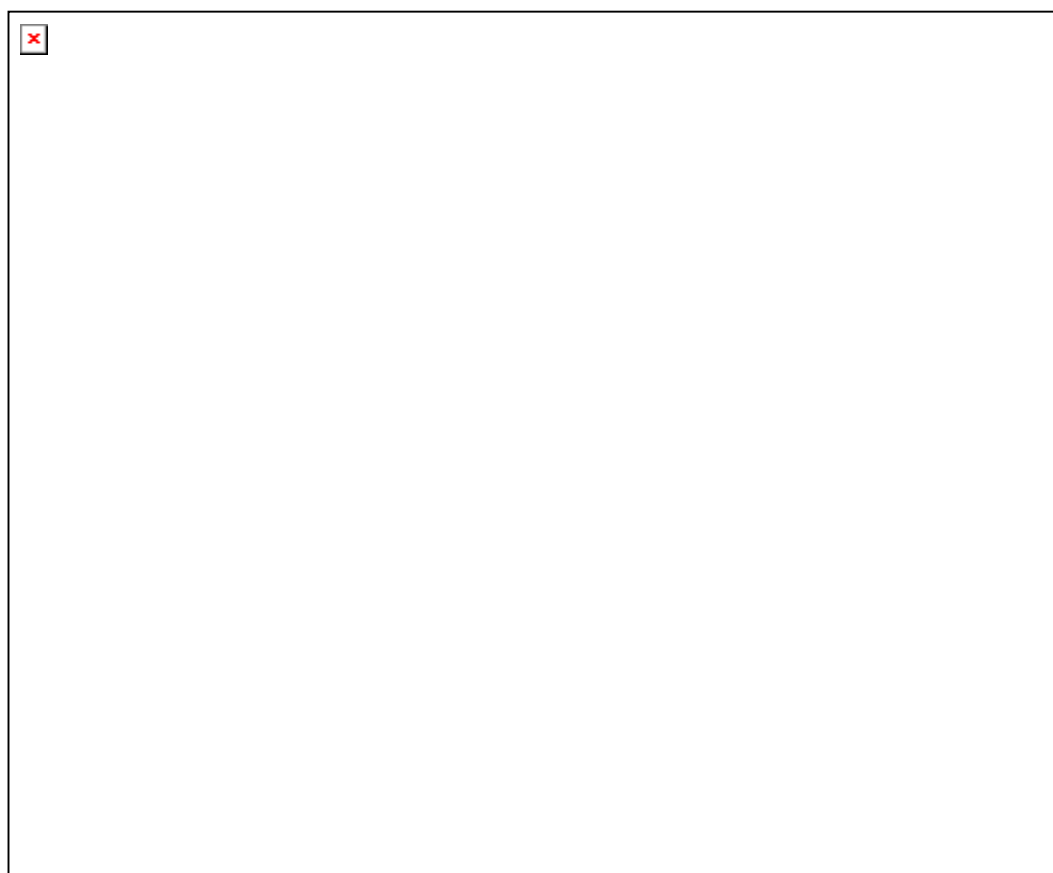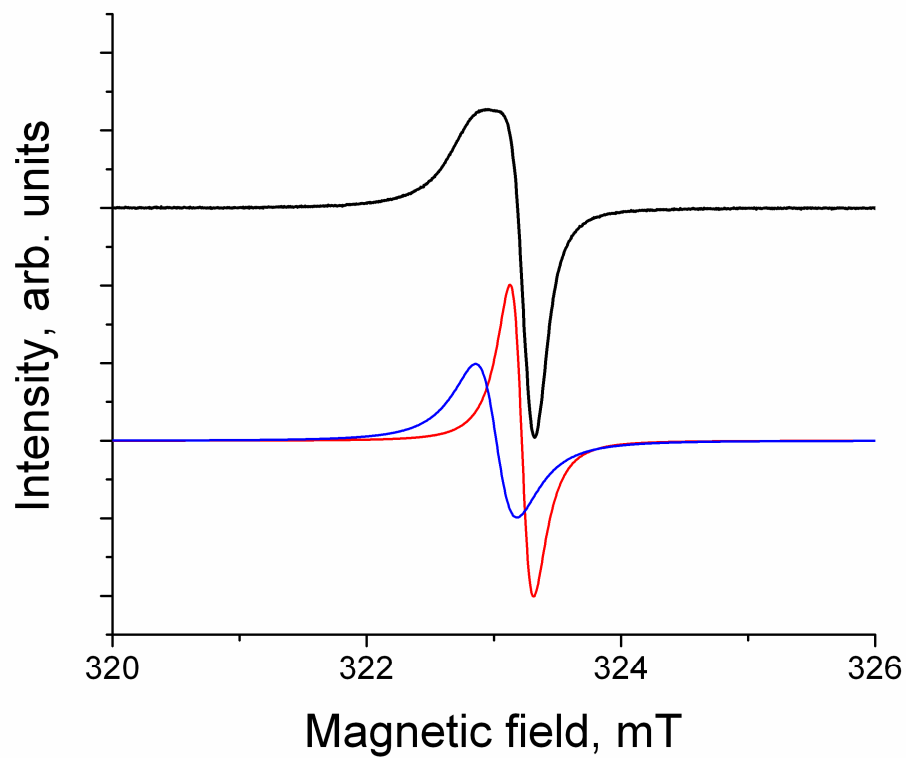

Simulation of the spectrum of **1** at 4 K by two Lorentz lines.
